# Supplementary material for: Electronic, optical, and adsorption properties of Li-doped hexagonal boron nitride: a GW approach
Source: Royal Society of Chemistry journal article supplement (doi:10.1039/d3cp04710e), 2024-01-01
Supplement: d3cp04710e1.pdf [file d3cp04710e1.pdf]

### Supplementary Information

#### Electronic, optical, and adsorption properties of Li doped hexagonal boron nitride: A GW approach

Dhanjit Talukdar\*, Shilpi Stuti Bora, and Gazi A. Ahmed

Optoelectronics and Photonics Laboratory, Department of Physics, Tezpur University, Napaam 784028, Assam, India

\*Corresponding author: [talukdardhanjit123@gmail.com](mailto:talukdardhanjit123@gmail.com)

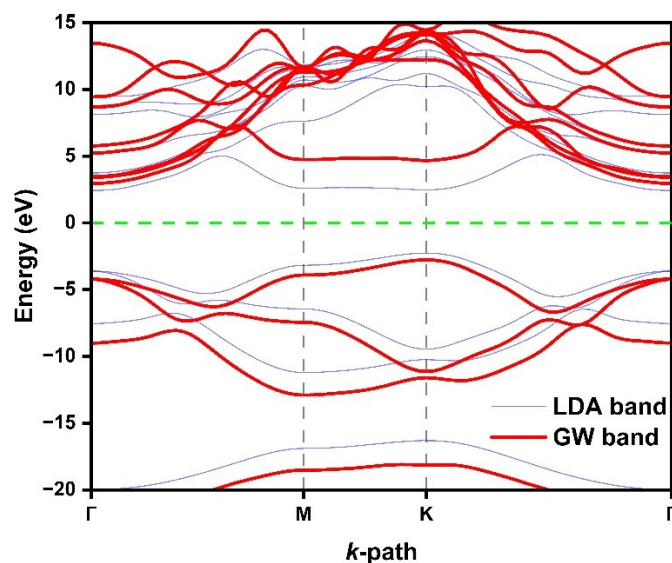

Figure S1: Band structure of pristine *h*-BN monolayer.

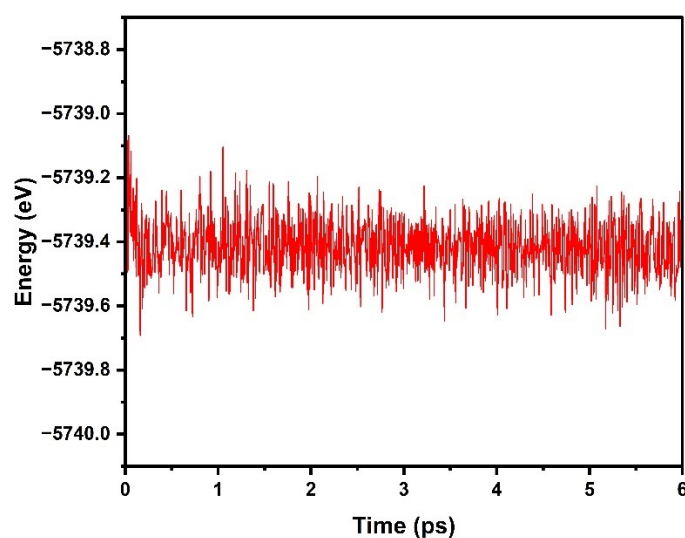

Figure S2: MD simulation at 300 K of *h*-BN<sup>Li</sup> monolayer.

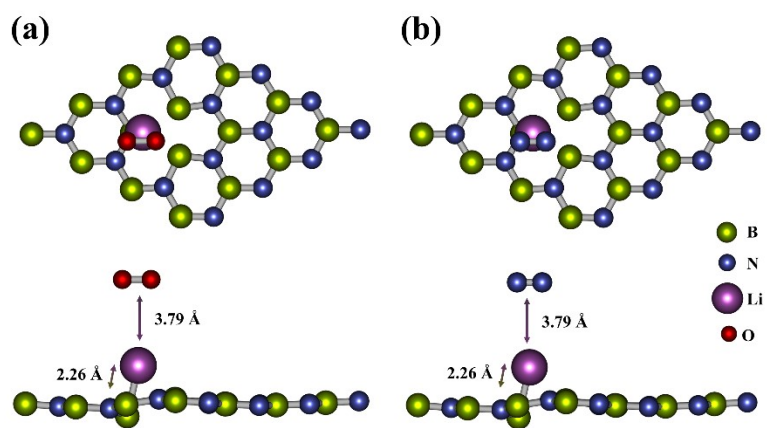

**Figure S3:** Optimised structures of (a)  $O_2$  adsorbed  $h\text{-BN}^{\text{Li}}$ , and (b)  $N_2$  adsorbed  $h\text{-BN}^{\text{Li}}$ .
